# Supplementary material for: Structural differences in the luminescence properties of lanthanide doped orthorhombic and monoclinic phases of Y2GeO5
Source: Royal Society of Chemistry journal article supplement (doi:10.1039/c3ra41953c), 2013-01-01
Supplement: c3ra41953c.pdf [file c3ra41953c.pdf]

## Supplementary materials

### Structural differences in the luminescence properties of lanthanide doped orthorhombic and monoclinic phases of $\text{Y}_2\text{GeO}_5$

Alpa Shah, Adish Tyagi, B. S. Naidu, V. Sudarsan, R. K. Vatsa and V. K. Jain\*

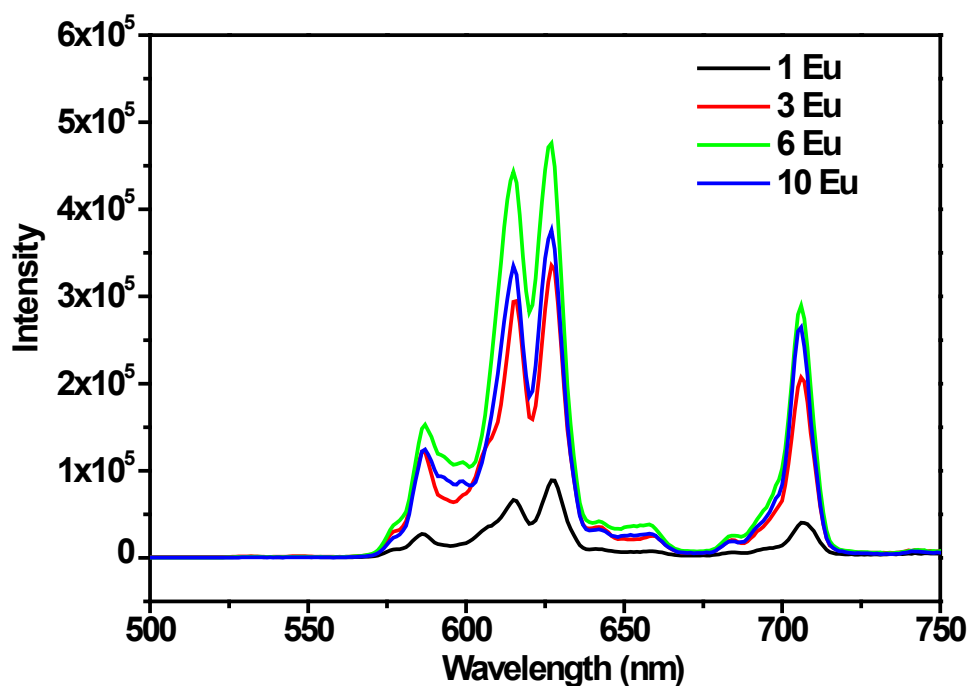

**Fig. S1.** Emission spectra from orthorhombic  $\text{Y}_2\text{GeO}_5$  sample doped with 1, 3, 6 and 10 at%  $\text{Eu}^{3+}$  ions. Samples were excited at 260 nm.

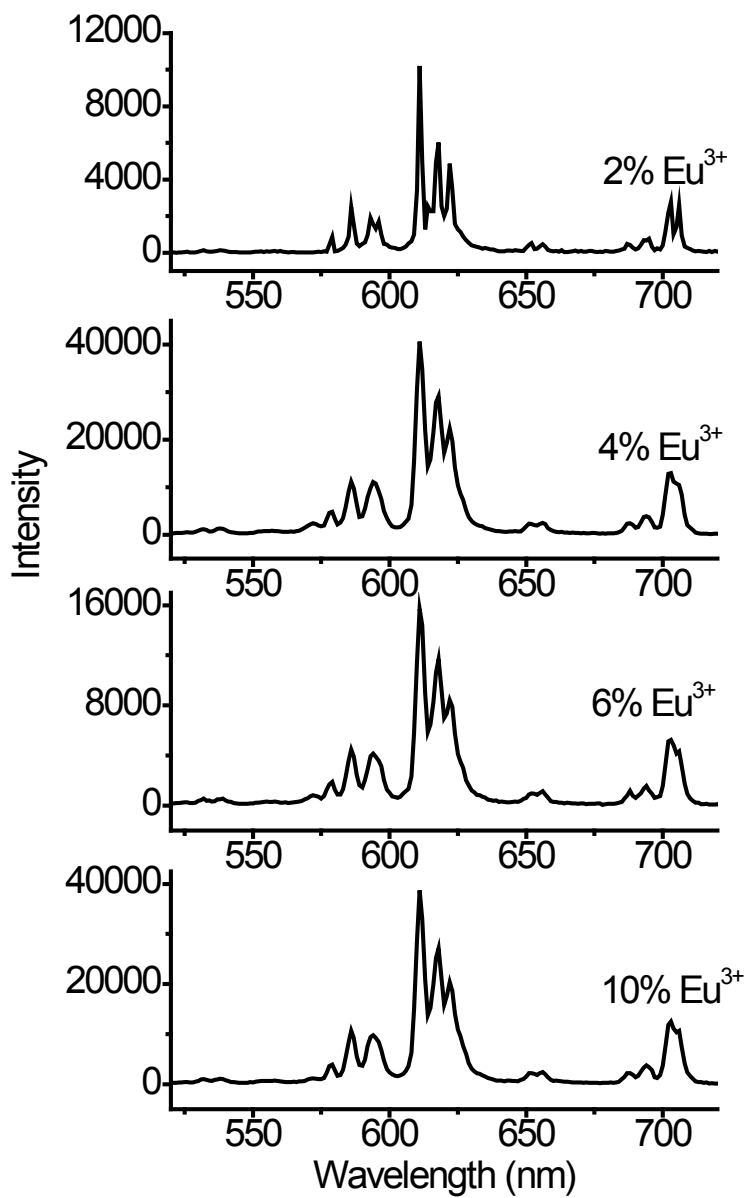

**Fig. S2.** Emission spectra from monoclinic  $\text{Y}_2\text{GeO}_5$  sample doped with 2, 4, 6 and 10 at%  $\text{Eu}^{3+}$  ions. Samples were excited at 260 nm
